# Supplementary material for: GlycA and CRP Are Genetically Correlated: Insight into the Genetic Architecture of Inflammageing
Source: MDPI journal article supplement (doi:10.3390/biom14050563), 2024-05-08
Supplement: s1 [file s1]

**GlycA and CRP are genetically correlated: insight into the genetic architecture of inflammation.**

Melody Kasher, Maxim B. Freidin, Frances MK Williams, CHARGE Inflammation Working Group, Gregory Livshits

**Supplementary Material.**

**Table S1.** List of 70 inflammatory mediators presented from the Olink 96 panel

| <b><u>Inflammatory Factors</u></b>                            |
|---------------------------------------------------------------|
| TNF-related_apoptosis-inducing_ligand                         |
| Adenosine_deaminase                                           |
| Axin-1                                                        |
| Caspase_8                                                     |
| Chemokine_C-C_motif_ligand_11                                 |
| Chemokine_C-C_motif_ligand_19                                 |
| Chemokine_C-C_motif_ligand_20                                 |
| Chemokine_C-C_motif_ligand_23                                 |
| Chemokine_C-C_motif_ligand_25                                 |
| Chemokine_C-C_motif_ligand_28                                 |
| Chemokine_C-C_motif_ligand_3                                  |
| Chemokine_C-C_motif_ligand_4                                  |
| chemokine_C-X3-C_motif_ligand_1                               |
| cluster_of_differentiation_244                                |
| cluster_of_differentiation_5                                  |
| cluster_of_differentiation_6                                  |
| cluster_of_differentiation_6                                  |
| cluster_of_differentiation_8_alpha                            |
| Colony_Stimulating_Factor_1                                   |
| CUB_domain_containing_protein_1                               |
| C-X-C_motif_chemokine_11                                      |
| C-X-C_motif_chemokine_ligand_1                                |
| C-X-C_motif_chemokine_ligand_10                               |
| C-X-C_motif_chemokine_ligand_5                                |
| C-X-C_motif_chemokine_ligand_6                                |
| C-X-C_motif_chemokine_ligand_9                                |
| Cystatin_D                                                    |
| Delta_and_Notch-like_epidermal_growth-factor-related_receptor |
| EN-RAGE                                                       |
| Fibroblast_Growth_Factor-21                                   |
| Fibroblast_Growth-Factor-19                                   |
| Flt-3_Ligand                                                  |
| Hepatocyte_Growth_Factor                                      |

|                                                           |
|-----------------------------------------------------------|
| Inteleukin_6                                              |
| Interferon_gamma                                          |
| Interleukin_10                                            |
| Interleukin_10RB                                          |
| Interleukin_12B                                           |
| Interleukin_15RA                                          |
| Interleukin_17C                                           |
| Interleukin_18                                            |
| Interleukin_18R1                                          |
| Interleukin_7                                             |
| Interleukin_8                                             |
| latency-associated_peptide_TGF_beta1                      |
| Leukemia_inhibitory_factor_receptor                       |
| matrix_metalloproteinases-1                               |
| matrix_metalloproteinases-10                              |
| Monocyte_Chemoattractant_Protein-1                        |
| Monocyte_Chemoattractant_Protein-2                        |
| Monocyte_Chemoattractant_Protein-4                        |
| Neurotrophin-3                                            |
| Oncostatin_M                                              |
| Osteoprotegerin                                           |
| Programmed_death-ligand_1                                 |
| Signaling_Lymphocytic_Activation_Molecule_Family_Member_1 |
| Sirtuin_2                                                 |
| STAM_Binding_Protein                                      |
| Stem_cell_factor                                          |
| Sulfotransferase_1A1                                      |
| TNF_Receptor_Superfamily_Member_9                         |
| TNF_Superfamily_Member_14                                 |
| TNF-related_activation-induced_cytokine                   |
| TNF-related_weak_inducer_of_apoptosis                     |
| Transforming_growth_factor_alpha                          |
| Tumor_necrosis_factor                                     |
| Tumor_Necrosis_Factor_B                                   |
| Urokinase-type_plasminogen-activator                      |
| Vascular_Endothelial_Growth_Factor_A                      |
| X4E_BP1                                                   |

**Table S2.** Correlations between **GlycA** and Inflammatory Mediators

| <b>Variable</b>  | <b>GlycA Correlations</b> | <b>GlycA SE</b> | <b>GlycA p-values</b> |
|------------------|---------------------------|-----------------|-----------------------|
| <b>ADA</b>       | 0.0355                    | 0.0259          | 1.70E-01              |
| <b>AXIN1</b>     | 0.0368                    | 0.0257          | 1.52E-01              |
| <b>CASP.8</b>    | 0.0884                    | 0.0256          | 5.52E-04              |
| <b>CCL11</b>     | -0.0062                   | 0.0270          | 8.19E-01              |
| <b>CCL19</b>     | 0.1425                    | 0.0284          | 1.14E-08              |
| <b>CCL20</b>     | 0.0844                    | 0.0258          | 1.10E-03              |
| <b>CCL23</b>     | 0.1844                    | 0.0254          | 6.14E-13              |
| <b>CCL25</b>     | -0.0748                   | 0.0272          | 6.11E-03              |
| <b>CCL28</b>     | -0.0709                   | 0.0266          | 7.68E-04              |
| <b>CCL3</b>      | 0.1844                    | 0.0254          | 6.14E-13              |
| <b>CCL4</b>      | 0.0908                    | 0.0255          | 3.83E-04              |
| <b>CD244</b>     | 0.0272                    | 0.0257          | 2.91E-01              |
| <b>CD40</b>      | 0.1153                    | 0.0256          | 7.08E-06              |
| <b>CD5</b>       | 0.1101                    | 0.0256          | 1.85E-05              |
| <b>CD6</b>       | 0.0210                    | 0.0263          | 4.25E-01              |
| <b>CD8A</b>      | 0.0191                    | 0.0249          | 4.45E-01              |
| <b>CDCP1</b>     | 0.0931                    | 0.0299          | 1.91E-03              |
| <b>CSF.1</b>     | 0.1348                    | 0.0256          | 1.56E-07              |
| <b>CST5</b>      | -0.0239                   | 0.0265          | 3.68E-01              |
| <b>CX3CL1</b>    | -0.0458                   | 0.0255          | 7.23E-02              |
| <b>CXCL1</b>     | 0.0563                    | 0.0257          | 2.85E-02              |
| <b>CXCL10</b>    | 0.0283                    | 0.0259          | 2.76E-01              |
| <b>CXCL11</b>    | 0.0938                    | 0.0251          | 1.89E-04              |
| <b>CXCL5</b>     | 0.0813                    | 0.0255          | 1.46E-03              |
| <b>CXCL6</b>     | 0.0453                    | 0.0258          | 7.95E-02              |
| <b>CXCL9</b>     | 0.0020                    | 0.0282          | 9.42E-01              |
| <b>DNER</b>      | -0.1279                   | 0.0256          | 6.81E-07              |
| <b>EN.RAGE</b>   | 0.1056                    | 0.0260          | 5.07E-05              |
| <b>FGF.19</b>    | 0.0109                    | 0.0259          | 6.74E-01              |
| <b>FGF.21</b>    | 0.1774                    | 0.0255          | 4.78E-12              |
| <b>Flt3L</b>     | -0.0235                   | 0.0267          | 3.79E-01              |
| <b>HGF</b>       | 0.2368                    | 0.0260          | <2.00E-16             |
| <b>IFN.gamma</b> | 0.0306                    | 0.0254          | 2.35E-01              |
| <b>IL.10RB</b>   | 0.1117                    | 0.0255          | 1.28E-05              |
| <b>IL.12B</b>    | 0.0843                    | 0.0257          | 1.07E-03              |

|                       |         |        |           |
|-----------------------|---------|--------|-----------|
| <b>IL.15RA</b>        | 0.1108  | 0.0281 | 8.54E-05  |
| <b>IL.17C</b>         | -0.0201 | 0.0276 | 4.68E-01  |
| <b>IL.18R1</b>        | 0.2325  | 0.0244 | <2.00E-16 |
| <b>IL10</b>           | 0.0693  | 0.0261 | 7.96E-03  |
| <b>IL18</b>           | 0.0850  | 0.0256 | 9.18E-04  |
| <b>IL6</b>            | 0.1670  | 0.0316 | 1.48E-07  |
| <b>IL7</b>            | 0.0994  | 0.0262 | 1.52E-04  |
| <b>IL8</b>            | 0.0880  | 0.0266 | 9.62E-04  |
| <b>LAP.TGF.beta.1</b> | 0.0968  | 0.0256 | 1.59E-04  |
| <b>LIF.R</b>          | -0.0571 | 0.0262 | 2.91E-02  |
| <b>MCP.1</b>          | 0.0681  | 0.0260 | 8.95E-03  |
| <b>MCP.2</b>          | 0.0770  | 0.0260 | 3.14E-03  |
| <b>MCP.4</b>          | 0.0438  | 0.0257 | 8.89E-02  |
| <b>MMP.1</b>          | 0.0772  | 0.0252 | 2.22E-03  |
| <b>MMP.10</b>         | 0.0814  | 0.0256 | 1.50E-03  |
| <b>NT.3</b>           | -0.0534 | 0.0252 | 3.40E-02  |
| <b>OPG</b>            | 0.0271  | 0.0271 | 3.18E-01  |
| <b>OSM</b>            | 0.2153  | 0.0255 | <2.00E-16 |
| <b>PD.L1</b>          | 0.0894  | 0.0254 | 4.46E-04  |
| <b>SCF</b>            | -0.0109 | 0.0260 | 6.76E-01  |
| <b>SIRT2</b>          | 0.0315  | 0.0280 | 2.61E-01  |
| <b>SLAMF1</b>         | 0.0670  | 0.0266 | 1.18E-02  |
| <b>ST1A1</b>          | 0.0743  | 0.0257 | 3.93E-03  |
| <b>STAMBP</b>         | 0.0495  | 0.0258 | 5.51E-02  |
| <b>TGF.alpha</b>      | 0.1283  | 0.0259 | 8.21E-07  |
| <b>TNF</b>            | 0.1054  | 0.0255 | 3.75E-06  |
| <b>TNFB</b>           | -0.0168 | 0.0252 | 5.06E-01  |
| <b>TNFRSF9</b>        | 0.0455  | 0.0263 | 8.36E-02  |
| <b>TNFSF14</b>        | 0.2049  | 0.0251 | 7.07E-16  |
| <b>TRAIL</b>          | 0.0230  | 0.0258 | 3.72E-01  |
| <b>TRANCE</b>         | 0.0671  | 0.0255 | 8.68E-03  |
| <b>TWEAK</b>          | -0.1278 | 0.0258 | 7.81E-07  |
| <b>uPA</b>            | -0.0931 | 0.0262 | 3.94E-04  |
| <b>VEGFA</b>          | 0.1965  | 0.0259 | 5.32E-14  |
| <b>X4E.BP1</b>        | 0.0511  | 0.0253 | 4.39E-02  |

Correlations were adjusted for age and standardized.

Of the 70 correlations, 44 are significantly correlated with GlycA

**Table S3.** Correlations between hsCRP and inflammatory mediators

| <b>Variable</b>  | <b>hsCRP correlations</b> | <b>hsCRP SE</b> | <b>hsCRP p-values</b> |
|------------------|---------------------------|-----------------|-----------------------|
| <b>ADA</b>       | -0.0204                   | 0.0286          | 4.77E-01              |
| <b>AXIN1</b>     | 0.0520                    | 0.0282          | 6.52E-02              |
| <b>CASP.8</b>    | 0.0073                    | 0.0282          | 7.95E-01              |
| <b>CCL11</b>     | -0.0022                   | 0.0996          | 9.42E-01              |
| <b>CCL19</b>     | 0.1462                    | 0.0274          | 1.10E-07              |
| <b>CCL20</b>     | 0.0856                    | 0.0274          | 1.84E-03              |
| <b>CCL23</b>     | 0.0516                    | 0.0285          | 7.06E-02              |
| <b>CCL25</b>     | -0.0015                   | 0.0300          | 9.61E-01              |
| <b>CCL28</b>     | -0.0280                   | 0.0296          | 3.44E-01              |
| <b>CCL3</b>      | 0.1343                    | 0.0285          | 2.59E-06              |
| <b>CCL4</b>      | 0.0997                    | 0.0283          | 4.46E-04              |
| <b>CD244</b>     | 0.0492                    | 0.2821          | 8.16E-02              |
| <b>CD40</b>      | 0.0828                    | 0.0283          | 3.45E-03              |
| <b>CD5</b>       | 0.0755                    | 0.0281          | 7.29E-03              |
| <b>CD6</b>       | 0.0147                    | 0.0287          | 6.09E-01              |
| <b>CD8A</b>      | 0.0563                    | 0.0273          | 3.97E-02              |
| <b>CDCP1</b>     | 0.1168                    | 0.0330          | 4.20E-04              |
| <b>CSF.1</b>     | 0.1470                    | 0.0283          | 2.39E-07              |
| <b>CST5</b>      | 0.0316                    | 0.0293          | 2.82E-01              |
| <b>CX3CL1</b>    | -0.0419                   | 0.0281          | 1.36E-01              |
| <b>CXCL1</b>     | 0.0472                    | 0.0282          | 9.38E-02              |
| <b>CXCL10</b>    | 0.0502                    | 0.0288          | 8.15E-02              |
| <b>CXCL11</b>    | 0.0956                    | 0.0276          | 5.54E-04              |
| <b>CXCL5</b>     | 0.0405                    | 0.0280          | 1.49E-01              |
| <b>CXCL6</b>     | 0.0346                    | 0.0282          | 2.21E-01              |
| <b>CXCL9</b>     | 0.0579                    | 0.0319          | 6.98E-02              |
| <b>DNER</b>      | -0.1426                   | 0.0282          | 4.75E-07              |
| <b>EN.RAGE</b>   | 0.0918                    | 0.0285          | 1.29E-04              |
| <b>FGF.19</b>    | 0.0286                    | 0.0285          | 3.17E-01              |
| <b>FGF.21</b>    | 0.0614                    | 0.0283          | 3.02E-02              |
| <b>Flt3L</b>     | 0.0069                    | 0.0293          | 8.13E-01              |
| <b>HGF</b>       | 0.1477                    | 0.0297          | 7.31E-07              |
| <b>IFN.gamma</b> | 0.0551                    | 0.0283          | 5.19E-02              |
| <b>IL.10RB</b>   | 0.1036                    | 0.0281          | 2.37E-04              |
| <b>IL.12B</b>    | 0.0704                    | 0.0283          | 1.29E-02              |

|                       |         |        |          |
|-----------------------|---------|--------|----------|
| <b>IL.15RA</b>        | 0.0953  | 0.0322 | 3.08E-03 |
| <b>IL.17C</b>         | 0.0682  | 0.0311 | 2.85E-02 |
| <b>IL.18R1</b>        | 0.1618  | 0.0274 | 4.29E-09 |
| <b>IL10</b>           | 0.1048  | 0.0287 | 2.68E-04 |
| <b>IL18</b>           | 0.0594  | 0.0282 | 3.54E-02 |
| <b>IL6</b>            | 0.2553  | 0.0382 | 3.81E-11 |
| <b>IL7</b>            | 0.0563  | 0.0290 | 5.24E-02 |
| <b>IL8</b>            | 0.0491  | 0.2960 | 9.72E-02 |
| <b>LAP.TGF.beta.1</b> | 0.0906  | 0.0282 | 1.33E-03 |
| <b>LIF.R</b>          | 0.0022  | 0.0286 | 9.39E-01 |
| <b>MCP.1</b>          | 0.0625  | 0.0291 | 3.17E-02 |
| <b>MCP.2</b>          | 0.0319  | 0.0288 | 1.74E-01 |
| <b>MCP.4</b>          | 0.0081  | 0.0285 | 7.78E-01 |
| <b>MMP.1</b>          | 0.0660  | 0.0279 | 1.79E-02 |
| <b>MMP.10</b>         | 0.0551  | 0.0282 | 5.05E-02 |
| <b>NT.3</b>           | -0.0219 | 0.0277 | 4.30E-01 |
| <b>OPG</b>            | 0.0698  | 0.0301 | 2.38E-02 |
| <b>OSM</b>            | 0.1539  | 0.0283 | 6.22E-08 |
| <b>PD.L1</b>          | 0.0760  | 0.0279 | 6.60E-03 |
| <b>SCF</b>            | -0.0328 | 0.0282 | 2.45E-01 |
| <b>SIRT2</b>          | 0.0163  | 0.0313 | 6.02E-01 |
| <b>SLAMF1</b>         | 0.1030  | 0.0297 | 5.50E-04 |
| <b>ST1A1</b>          | 0.0089  | 0.0287 | 7.57E-01 |
| <b>STAMBP</b>         | 0.0295  | 0.0283 | 2.96E-01 |
| <b>TGF.alpha</b>      | 0.0784  | 0.0285 | 6.00E-03 |
| <b>TNF</b>            | 0.1137  | 0.0282 | 5.93E-05 |
| <b>TNFB</b>           | -0.0114 | 0.0278 | 6.82E-01 |
| <b>TNFRSF9</b>        | 0.1023  | 0.0290 | 4.42E-04 |
| <b>TNFSF14</b>        | 0.1305  | 0.0280 | 3.51E-06 |
| <b>TRAIL</b>          | 0.0742  | 0.0285 | 9.22E-03 |
| <b>TRANCE</b>         | 0.0097  | 0.0281 | 7.29E-01 |
| <b>TWEAK</b>          | -0.1172 | 0.0285 | 3.97E-05 |
| <b>uPA</b>            | -0.0063 | 0.0290 | 8.29E-01 |
| <b>VEGFA</b>          | 0.1587  | 0.0289 | 4.65E-08 |
| <b>X4E.BP1</b>        | 0.0236  | 0.0280 | 4.00E-01 |

Correlations were adjusted for age and standardized.

Of the 70 correlations, 36 are significantly correlated with hsCRP

**Table S4.** PRS results for GlycA and CRP

| <b>Base. GWAS</b>               | <b>Threshold</b> | <b>PRS.R2</b> | <b>Full.R2</b> | <b>Null.R2</b> | <b>Coefficient</b> | <b>Stand Error</b> | <b>P</b> | <b>Num_SNP</b> |
|---------------------------------|------------------|---------------|----------------|----------------|--------------------|--------------------|----------|----------------|
| <b>GlycA – target phenotype</b> |                  |               |                |                |                    |                    |          |                |
| <b>B_NGF</b>                    | 0.3904           | 0.0047        | 0.0167         | 0.0120         | -197.16            | 69.70              | 4.73E-03 | 86767          |
| <b>CRP</b>                      | 0.0525           | 0.0084        | 0.0205         | 0.0120         | 479.34             | 125.94             | 1.46E-04 | 24677          |
| <b>CTACK</b>                    | 0.0004           | 0.0015        | 0.0136         | 0.0120         | -3.80              | 2.35               | 1.06E-01 | 321            |
| <b>EOTAXIN</b>                  | 0.0076           | 0.0015        | 0.0136         | 0.0120         | -25.62             | 15.75              | 1.04E-01 | 4562           |
| <b>FGF_BASIC</b>                | 0.0005           | 0.0018        | 0.0138         | 0.0120         | 6.86               | 3.95               | 8.25E-02 | 390            |
| <b>GCSF</b>                     | 0.2646           | 0.0029        | 0.0150         | 0.0120         | -191.20            | 85.64              | 2.57E-02 | 69225          |
| <b>GROA</b>                     | 0.0026           | 0.0045        | 0.0166         | 0.0120         | 16.04              | 5.76               | 5.43E-03 | 1632           |
| <b>HGF</b>                      | 0.0047           | 0.0032        | 0.0152         | 0.0120         | 29.60              | 12.68              | 1.97E-02 | 3025           |
| <b>IFN_gamma</b>                | 0.0301           | 0.0008        | 0.0128         | 0.0120         | 34.43              | 29.48              | 2.43E-01 | 13752          |
| <b>IL10</b>                     | 0.3433           | 0.0030        | 0.0151         | 0.0120         | -212.77            | 93.28              | 2.27E-02 | 81302          |
| <b>IL12</b>                     | 0.1460           | 0.0049        | 0.0170         | 0.0120         | -184.79            | 63.64              | 3.74E-03 | 46700          |
| <b>IL13</b>                     | 0.0009           | 0.0012        | 0.0133         | 0.0120         | -5.42              | 3.73               | 1.46E-01 | 721            |
| <b>IL16</b>                     | 0.0003           | 0.0032        | 0.0153         | 0.0120         | 3.93               | 1.67               | 1.86E-02 | 186            |
| <b>IL17</b>                     | 0.0003           | 0.0032        | 0.0152         | 0.0120         | -7.56              | 3.23               | 1.95E-02 | 277            |
| <b>IL18</b>                     | 0.0000           | 0.0023        | 0.0144         | 0.0120         | 0.23               | 0.11               | 4.64E-02 | 6              |
| <b>IL1B</b>                     | 0.0069           | 0.0025        | 0.0145         | 0.0120         | -19.80             | 9.65               | 4.03E-02 | 3979           |
| <b>IL1RA</b>                    | 0.0001           | 0.0014        | 0.0134         | 0.0120         | 1.22               | 0.80               | 1.25E-01 | 41             |
| <b>IL2</b>                      | 0.0001           | 0.0019        | 0.0140         | 0.0120         | 2.20               | 1.21               | 7.00E-02 | 93             |
| <b>IL2RA</b>                    | 0.0021           | 0.0019        | 0.0139         | 0.0120         | 9.66               | 5.41               | 7.43E-02 | 1384           |
| <b>IL4</b>                      | 0.0174           | 0.0027        | 0.0147         | 0.0120         | -49.91             | 23.22              | 3.17E-02 | 8899           |
| <b>IL5</b>                      | 0.0002           | 0.0050        | 0.0171         | 0.0120         | 4.56               | 1.55               | 3.38E-03 | 144            |
| <b>IL6</b>                      | 1.0000           | 0.0017        | 0.0138         | 0.0120         | -256.67            | 149.02             | 8.52E-02 | 133811         |
| <b>IL7</b>                      | 0.0679           | 0.0029        | 0.0150         | 0.0120         | -65.97             | 29.43              | 2.51E-02 | 25883          |
| <b>IL8</b>                      | 0.0017           | 0.0020        | 0.0140         | 0.0120         | -9.39              | 5.12               | 6.67E-02 | 1209           |
| <b>IL9</b>                      | 0.0504           | 0.0023        | 0.0143         | 0.0120         | -53.39             | 27.05              | 4.85E-02 | 20691          |
| <b>IP10</b>                     | 0.0005           | 0.0013        | 0.0134         | 0.0120         | -3.87              | 2.55               | 1.30E-01 | 386            |
| <b>MCP1</b>                     | 0.0833           | 0.0010        | 0.0131         | 0.0120         | -64.51             | 48.49              | 1.84E-01 | 30681          |
| <b>MCP3</b>                     | 0.0035           | 0.0052        | 0.0173         | 0.0120         | -11.94             | 3.98               | 2.74E-03 | 2199           |
| <b>MCSF</b>                     | 0.0001           | 0.0038        | 0.0158         | 0.0120         | -1.93              | 0.76               | 1.08E-02 | 59             |
| <b>MIF</b>                      | 0.0001           | 0.0008        | 0.0129         | 0.0120         | 1.11               | 0.94               | 2.35E-01 | 60             |
| <b>MIG</b>                      | 0.0487           | 0.0048        | 0.0168         | 0.0120         | -72.30             | 25.28              | 4.29E-03 | 20112          |
| <b>MIP1A</b>                    | 0.0003           | 0.0043        | 0.0164         | 0.0120         | 5.47               | 2.00               | 6.44E-03 | 248            |

|                               |        |        |        |        |          |         |          |       |
|-------------------------------|--------|--------|--------|--------|----------|---------|----------|-------|
| <b>MIP1B</b>                  | 0.2459 | 0.0012 | 0.0133 | 0.0120 | -115.26  | 79.88   | 1.49E-01 | 65930 |
| <b>PDGF</b>                   | 0.0449 | 0.0029 | 0.0150 | 0.0120 | 86.18    | 38.51   | 2.53E-02 | 19340 |
| <b>RANTES</b>                 | 0.0013 | 0.0021 | 0.0141 | 0.0120 | -8.34    | 4.42    | 5.96E-02 | 959   |
| <b>SCF</b>                    | 0.0001 | 0.0013 | 0.0134 | 0.0120 | -2.00    | 1.32    | 1.31E-01 | 50    |
| <b>SCGF</b>                   | 0.0004 | 0.0042 | 0.0162 | 0.0120 | 6.80     | 2.54    | 7.43E-03 | 350   |
| <b>SDF1A</b>                  | 0.0953 | 0.0016 | 0.0137 | 0.0120 | -83.10   | 50.02   | 9.68E-02 | 33579 |
| <b>TNF_A</b>                  | 0.0032 | 0.0042 | 0.0162 | 0.0120 | -17.93   | 6.68    | 7.36E-03 | 2036  |
| <b>TNF_B</b>                  | 0.0051 | 0.0023 | 0.0143 | 0.0120 | -11.39   | 5.78    | 4.88E-02 | 2834  |
| <b>TRAIL</b>                  | 0.0700 | 0.0019 | 0.0140 | 0.0120 | 85.59    | 47.24   | 7.02E-02 | 27026 |
| <b>VEGF</b>                   | 0.0049 | 0.0025 | 0.0146 | 0.0120 | -23.60   | 11.32   | 3.71E-02 | 3167  |
| <b>CRP – target phenotype</b> |        |        |        |        |          |         |          |       |
| <b>B_NGF</b>                  | 0.0001 | 0.0005 | 0.0013 | 0.0008 | 38.01    | 25.75   | 1.40E-01 | 84    |
| <b>CRP</b>                    | 0.0001 | 0.0071 | 0.0079 | 0.0008 | 864.20   | 155.34  | 2.81E-08 | 507   |
| <b>CTACK</b>                  | 0.0122 | 0.0013 | 0.0021 | 0.0008 | 737.42   | 315.68  | 1.95E-02 | 6432  |
| <b>EOTAXIN</b>                | 0.0025 | 0.0007 | 0.0015 | 0.0008 | 361.04   | 208.77  | 8.38E-02 | 1784  |
| <b>FGF_BASIC</b>              | 0.0044 | 0.0004 | 0.0012 | 0.0008 | -358.94  | 277.27  | 1.96E-01 | 2841  |
| <b>GCSF</b>                   | 0.0002 | 0.0013 | 0.0022 | 0.0008 | 151.87   | 63.17   | 1.62E-02 | 182   |
| <b>GROA</b>                   | 0.0001 | 0.0017 | 0.0026 | 0.0008 | 32.43    | 11.76   | 5.83E-03 | 42    |
| <b>HGF</b>                    | 0.0388 | 0.0022 | 0.0030 | 0.0008 | 2526.22  | 819.79  | 2.07E-03 | 16920 |
| <b>IFN_gamma</b>              | 0.0001 | 0.0004 | 0.0012 | 0.0008 | -34.84   | 27.18   | 2.00E-01 | 43    |
| <b>IL10</b>                   | 0.0063 | 0.0014 | 0.0022 | 0.0008 | 816.14   | 331.20  | 1.38E-02 | 3851  |
| <b>IL12</b>                   | 0.0000 | 0.0008 | 0.0016 | 0.0008 | 11.29    | 6.21    | 6.89E-02 | 13    |
| <b>IL13</b>                   | 0.0098 | 0.0018 | 0.0026 | 0.0008 | 793.16   | 286.06  | 5.58E-03 | 5469  |
| <b>IL16</b>                   | 0.1295 | 0.0003 | 0.0011 | 0.0008 | 1075.56  | 944.12  | 2.55E-01 | 41281 |
| <b>IL17</b>                   | 0.0002 | 0.0004 | 0.0012 | 0.0008 | 79.30    | 63.41   | 2.11E-01 | 192   |
| <b>IL18</b>                   | 0.1069 | 0.0004 | 0.0013 | 0.0008 | -1213.68 | 900.54  | 1.78E-01 | 36606 |
| <b>IL1B</b>                   | 0.0009 | 0.0006 | 0.0014 | 0.0008 | 121.57   | 74.53   | 1.03E-01 | 608   |
| <b>IL1RA</b>                  | 0.0020 | 0.0021 | 0.0029 | 0.0008 | 390.15   | 128.89  | 2.48E-03 | 1435  |
| <b>IL2</b>                    | 0.0015 | 0.0007 | 0.0015 | 0.0008 | -187.34  | 106.85  | 7.96E-02 | 1027  |
| <b>IL2RA</b>                  | 0.3143 | 0.0006 | 0.0014 | 0.0008 | -2375.38 | 1487.98 | 1.10E-01 | 76236 |
| <b>IL4</b>                    | 0.0126 | 0.0008 | 0.0016 | 0.0008 | -864.17  | 473.95  | 6.83E-02 | 6744  |
| <b>IL5</b>                    | 0.0000 | 0.0011 | 0.0019 | 0.0008 | 4.33     | 2.01    | 3.12E-02 | 1     |
| <b>IL6</b>                    | 0.0003 | 0.0012 | 0.0020 | 0.0008 | -151.93  | 67.34   | 2.41E-02 | 209   |
| <b>IL7</b>                    | 0.0023 | 0.0013 | 0.0021 | 0.0008 | 311.91   | 132.34  | 1.85E-02 | 1592  |
| <b>IL8</b>                    | 0.0281 | 0.0002 | 0.0011 | 0.0008 | -480.02  | 466.23  | 3.03E-01 | 12903 |
| <b>IL9</b>                    | 0.0192 | 0.0009 | 0.0017 | 0.0008 | 773.62   | 392.08  | 4.85E-02 | 9498  |
| <b>IP10</b>                   | 0.0157 | 0.0007 | 0.0015 | 0.0008 | -627.41  | 357.22  | 7.91E-02 | 8275  |
| <b>MCP1</b>                   | 0.0954 | 0.0011 | 0.0019 | 0.0008 | -2693.09 | 1229.10 | 2.85E-02 | 33867 |
| <b>MCP3</b>                   | 0.0001 | 0.0006 | 0.0014 | 0.0008 | -24.82   | 15.29   | 1.05E-01 | 96    |
| <b>MCSF</b>                   | 0.0784 | 0.0008 | 0.0016 | 0.0008 | -1195.01 | 652.87  | 6.73E-02 | 28887 |



|               |        |        |        |        |          |         |          |       |
|---------------|--------|--------|--------|--------|----------|---------|----------|-------|
| <b>MIF</b>    | 0.0044 | 0.0002 | 0.0011 | 0.0008 | 196.45   | 191.37  | 3.05E-01 | 2798  |
| <b>MIG</b>    | 0.0000 | 0.0011 | 0.0020 | 0.0008 | 6.92     | 3.13    | 2.71E-02 | 2     |
| <b>MIP1A</b>  | 0.0154 | 0.0010 | 0.0019 | 0.0008 | 727.29   | 345.39  | 3.53E-02 | 7966  |
| <b>MIP1B</b>  | 0.0005 | 0.0006 | 0.0014 | 0.0008 | -107.63  | 68.69   | 1.17E-01 | 585   |
| <b>PDGF</b>   | 0.0148 | 0.0006 | 0.0015 | 0.0008 | -868.73  | 531.28  | 1.02E-01 | 8100  |
| <b>RANTES</b> | 0.3018 | 0.0005 | 0.0014 | 0.0008 | 2172.89  | 1422.49 | 1.27E-01 | 74301 |
| <b>SCF</b>    | 0.0007 | 0.0008 | 0.0017 | 0.0008 | -219.66  | 116.39  | 5.92E-02 | 540   |
| <b>SCGF</b>   | 0.0001 | 0.0008 | 0.0017 | 0.0008 | -42.38   | 22.26   | 5.71E-02 | 65    |
| <b>SDF1A</b>  | 0.0358 | 0.0008 | 0.0017 | 0.0008 | -1469.06 | 764.70  | 5.48E-02 | 15848 |
| <b>TNF_A</b>  | 0.0045 | 0.0013 | 0.0022 | 0.0008 | -449.89  | 186.96  | 1.62E-02 | 2691  |
| <b>TNF_B</b>  | 0.0019 | 0.0010 | 0.0018 | 0.0008 | -162.52  | 79.27   | 4.04E-02 | 1146  |
| <b>TRAIL</b>  | 0.0011 | 0.0018 | 0.0026 | 0.0008 | -391.97  | 141.91  | 5.77E-03 | 857   |
| <b>VEGF</b>   | 0.0082 | 0.0006 | 0.0014 | 0.0008 | -547.90  | 348.68  | 1.16E-01 | 4841  |

**Table S5.** MR GlycA as exposure using the IVW method

| <b>Outcome</b> | <b>Instrumental Variables</b> | <b>Estimate</b> | <b>SE</b> | <b>95% Confidence Interval</b> | <b>P-value</b> | <b>Heterogeneity</b> |
|----------------|-------------------------------|-----------------|-----------|--------------------------------|----------------|----------------------|
| <b>hsCRP</b>   | 21                            | 0.085           | 0.024     | 0.039, 0.132                   | <0.001         | 0.1698               |
| <b>FGF</b>     | 38                            | 0.276           | 0.063     | 0.153, 0.399                   | <0.001         | 0.6936               |
| <b>HGF</b>     | 41                            | 0.375           | 0.064     | 0.250, 0.500                   | <0.001         | 0.6368               |
| <b>IL6</b>     | 41                            | 0.266           | 0.060     | 0.147, 0.384                   | <0.001         | 0.7227               |
| <b>IL7</b>     | 36                            | 0.380           | 0.095     | 0.195, 0.566                   | <0.001         | 0.6706               |
| <b>TNFA</b>    | 37                            | 0.301           | 0.088     | 0.129, 0.474                   | 0.001          | 0.9659               |
| <b>VEGF</b>    | 45                            | 0.377           | 0.074     | 0.232, 0.523                   | <0.001         | 0.9801               |

**Table S6.** MR hsCRP as the exposure, using the IVW method

| <b>Outcome</b> | <b>Instrumental Variables</b> | <b>Estimate</b> | <b>SE</b> | <b>95% Confidence Interval</b> | <b>P-value</b> | <b>Heterogeneity</b> |
|----------------|-------------------------------|-----------------|-----------|--------------------------------|----------------|----------------------|
| <b>HGF</b>     | 34                            | 1.222           | 0.102     | 1.022, 1.422                   | <0.001         | 1.0000               |
| <b>IL6</b>     | 46                            | 0.276           | 0.052     | 0.174, 0.379                   | <0.001         | 0.8245               |
| <b>IL10</b>    | 38                            | 0.360           | 0.072     | 0.218, 0.502                   | <0.001         | 0.9966               |
| <b>TNFA</b>    | 35                            | 0.554           | 0.119     | 0.321, 0.787                   | <0.001         | 0.9999               |
| <b>VEGF</b>    | 35                            | 0.274           | 0.067     | 0.143, 0.405                   | <0.001         | 0.9442               |

**Table S7.** Gene Ontology results: enrichment analysis r for GlycA and CRP variables for gene ontology (GO) terms

| <b>GO ID<br/>(Term)</b>                                                              | <b>Class</b> | <b>Variable</b> | <b>Rank<br/>(Node)</b> | <b>Annotated</b> | <b>Significant</b> | <b>Expected</b> | <b>p-value<br/>(Fisher<br/>test)</b> |
|--------------------------------------------------------------------------------------|--------------|-----------------|------------------------|------------------|--------------------|-----------------|--------------------------------------|
| <b>GO:0007156<br/>(Homophilic<br/>cell<br/>adhesion via<br/>plasma<br/>membrane)</b> | BP           | GlycA           | 1                      | 163              | 147                | 123.6           | 3.60E-06                             |
|                                                                                      |              | CRP             | 1                      | 160              | 133                | 110.7           | 1.40E-05                             |
| <b>GO:0005515<br/>(protein<br/>binding)</b>                                          | MF           | GlycA           | 1                      | 13852            | 10967              | 10836.8         | 4.00E-08                             |
|                                                                                      |              | CRP             | 2                      | 13581            | 9564               | 9406.4          | 5.90E-07                             |
| <b>GO:0005829<br/>(cytosol)</b>                                                      | CC           | GlycA           | 1                      | 5137             | 4156               | 3898.3          | 1.00E-25                             |
|                                                                                      |              | CRP             | 1                      | 4984             | 3673               | 3443.7          | 2.50E-19                             |

GO terms are found in three classes: biological process (BP), molecular function (MF), and cellular component (CC).
